# Supplementary material for: B cells in the pneumococcus-infected lung are heterogeneous and require CD4+ T cell help including CD40L to become resident memory B cells
Source: PubMed Central journal article supplement (PMC11074383; doi:10.3389/fimmu.2024.1382638), 2024-04-23
Supplement: DataSheet_1.pdf [file DataSheet_1.pdf]

## Supplementary Figure 1

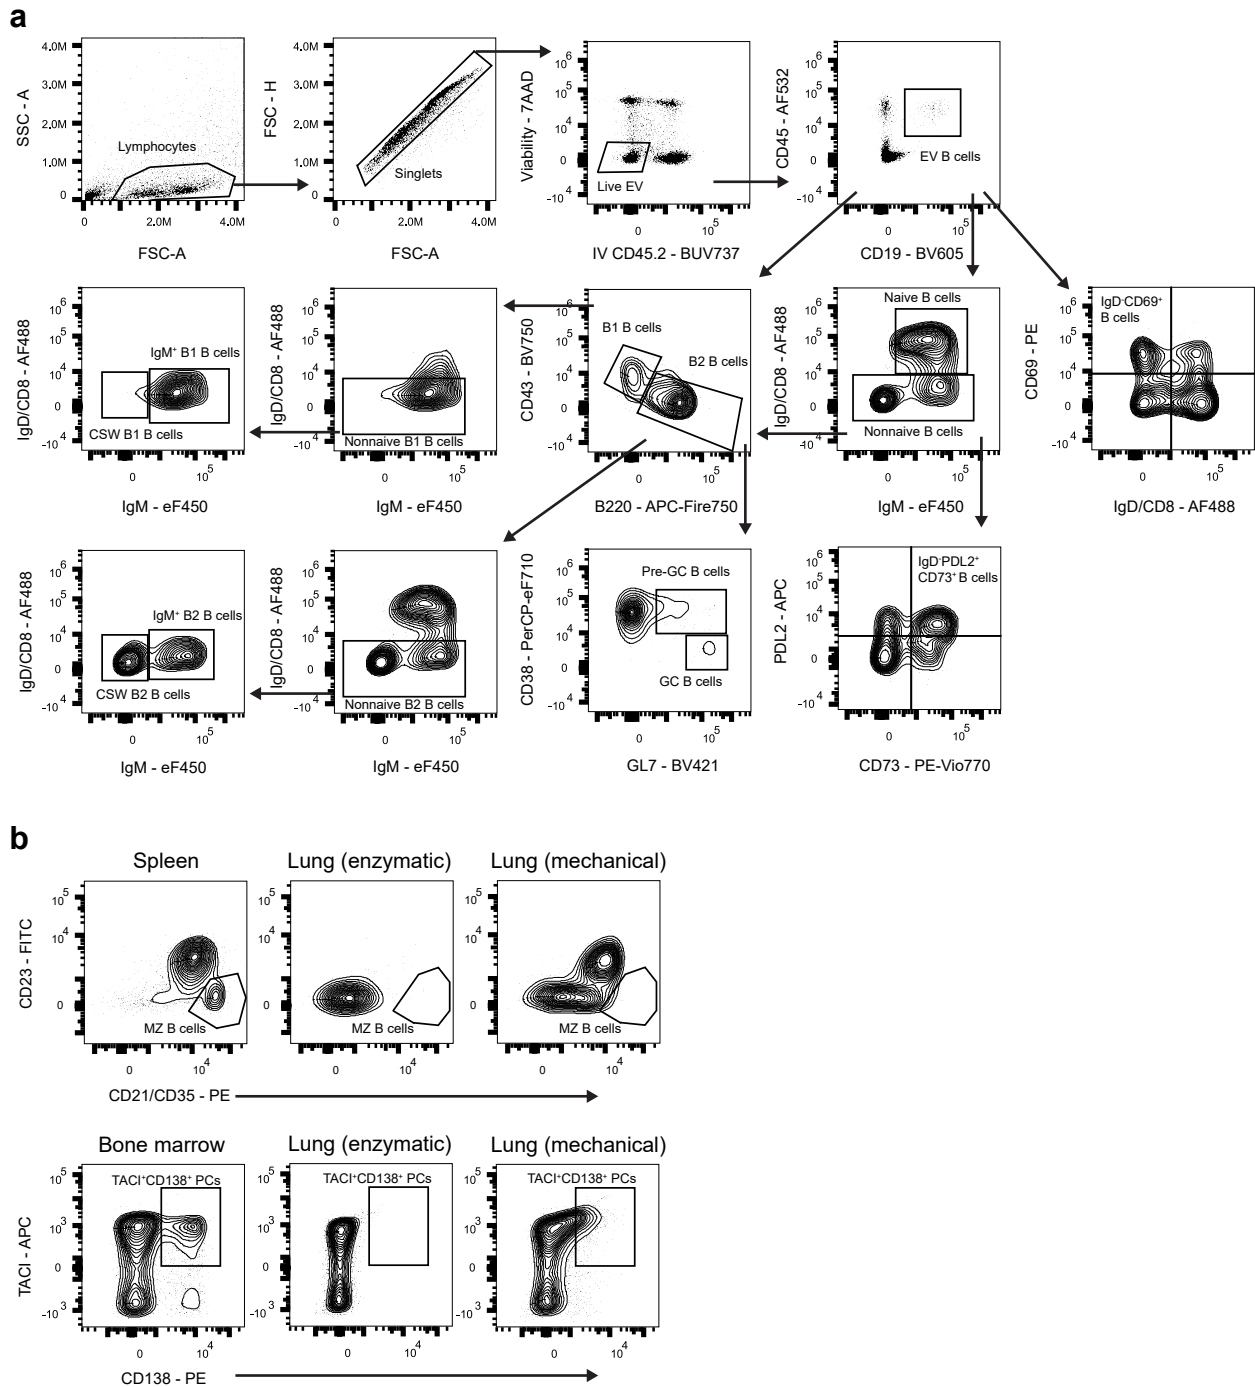

**Supplementary Figure 1: Gating strategies to evaluate EV B cell subsets. a)** Gating strategy used to evaluate live lung EV (i.v. CD45.2-) B cell populations for subset and kinetic studies. **b)** EV marginal zone (MZ) B cells denoted as CD23<sup>lo</sup>CD21/35<sup>hi</sup> from single cell suspensions derived from the spleen, lung after collagenase digestion, and lung after mechanical digest (non-enzymatic). EV plasma cells (PCs) denoted as CD138<sup>+</sup>TACI<sup>hi</sup> similarly depicted in the bone marrow and lung treated with collagenase digest or mechanical digest.

## Supplementary Figure 2

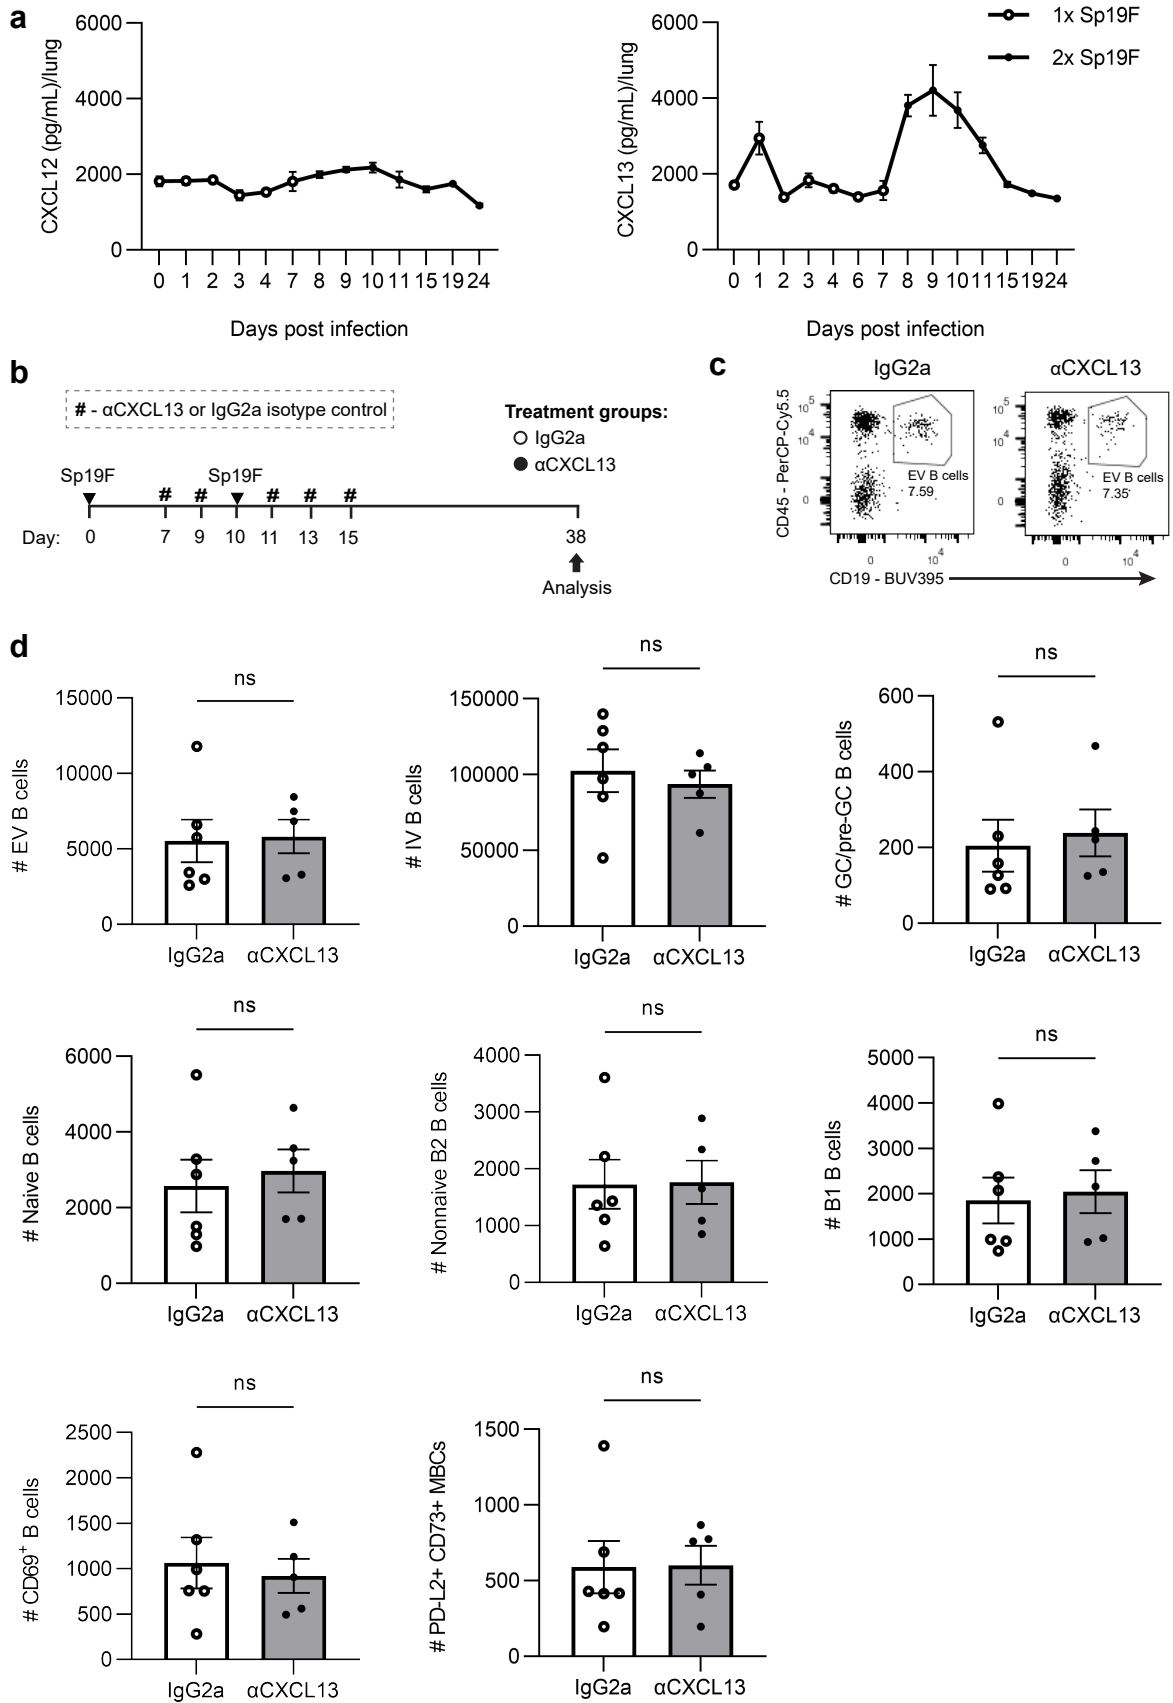

**Supplementary Figure 2:** CXCL13 increases in the lung after 2 infections but is dispensable for lung EV B cell maintenance. **a)** CXCL12 and CXCL13 protein (pg/mL) in whole lung homogenates collected from mice at the indicated timepoints after 1 and 2 Sp19F infections and detected via ELISAs. **b)**  $\alpha$ CXCL13 vs. IgG2a isotype control was administered i.p. and i.n. to B6 mice before, during, and after the second infection with Sp19F as indicated by the # symbols. Mice were euthanized at 28 dpi for flow cyto-metric analysis. **c)** Representative flow plots depicting EV B cells in Sp-experienced mice treated with  $\alpha$ CXCL13 or IgG2a at 28dpi. **d)** Enumeration of live EV B (i.v.CD45.2<sup>-</sup>CD19<sup>+</sup>), IV B (i.v.CD45.2<sup>+</sup>CD19<sup>+</sup>), GC/pre-GC (i.v.CD45.2<sup>-</sup>CD19<sup>+</sup>GL7<sup>+</sup>), naïve B (i.v.CD45.2<sup>-</sup>CD19<sup>+</sup>IgD<sup>+</sup>), non-naïve B2 B (i.v.CD45.2<sup>-</sup>CD19<sup>+</sup>IgD<sup>-</sup>CD43<sup>lo</sup>B220<sup>hi</sup>), B1 B (i.v.CD45.2<sup>-</sup>CD19<sup>+</sup>CD43<sup>hi</sup>B220<sup>lo</sup>), CD69<sup>+</sup> resident (i.v.CD45.2<sup>-</sup>CD19<sup>+</sup>CD69<sup>+</sup>) and memory (IgD<sup>-</sup>PD-L2<sup>+</sup>CD73<sup>+</sup>) B cells at 28 dpi after treatment with  $\alpha$ CXCL13 (white bars) or IgG2a (grey bars). n=5-6 per group across 2 independent experiments. Mann-Whitney tests; ns, not significant.

### Supplementary Figure 3

a

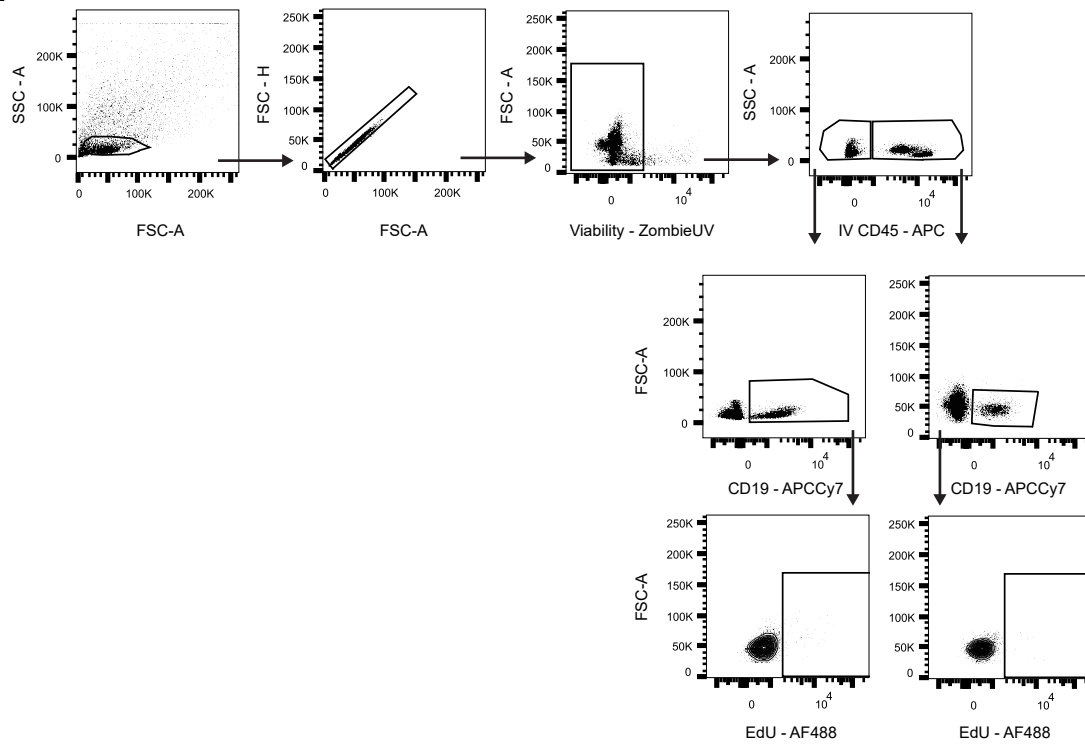

**Supplementary Figure 3:** Gating strategy to evaluate lung B cell proliferation. **a)** Representative flow plots demonstrating manual gating of EdU<sup>+</sup> EV B cell subsets based on fluorescence minus one controls.

### Supplementary Figure 4

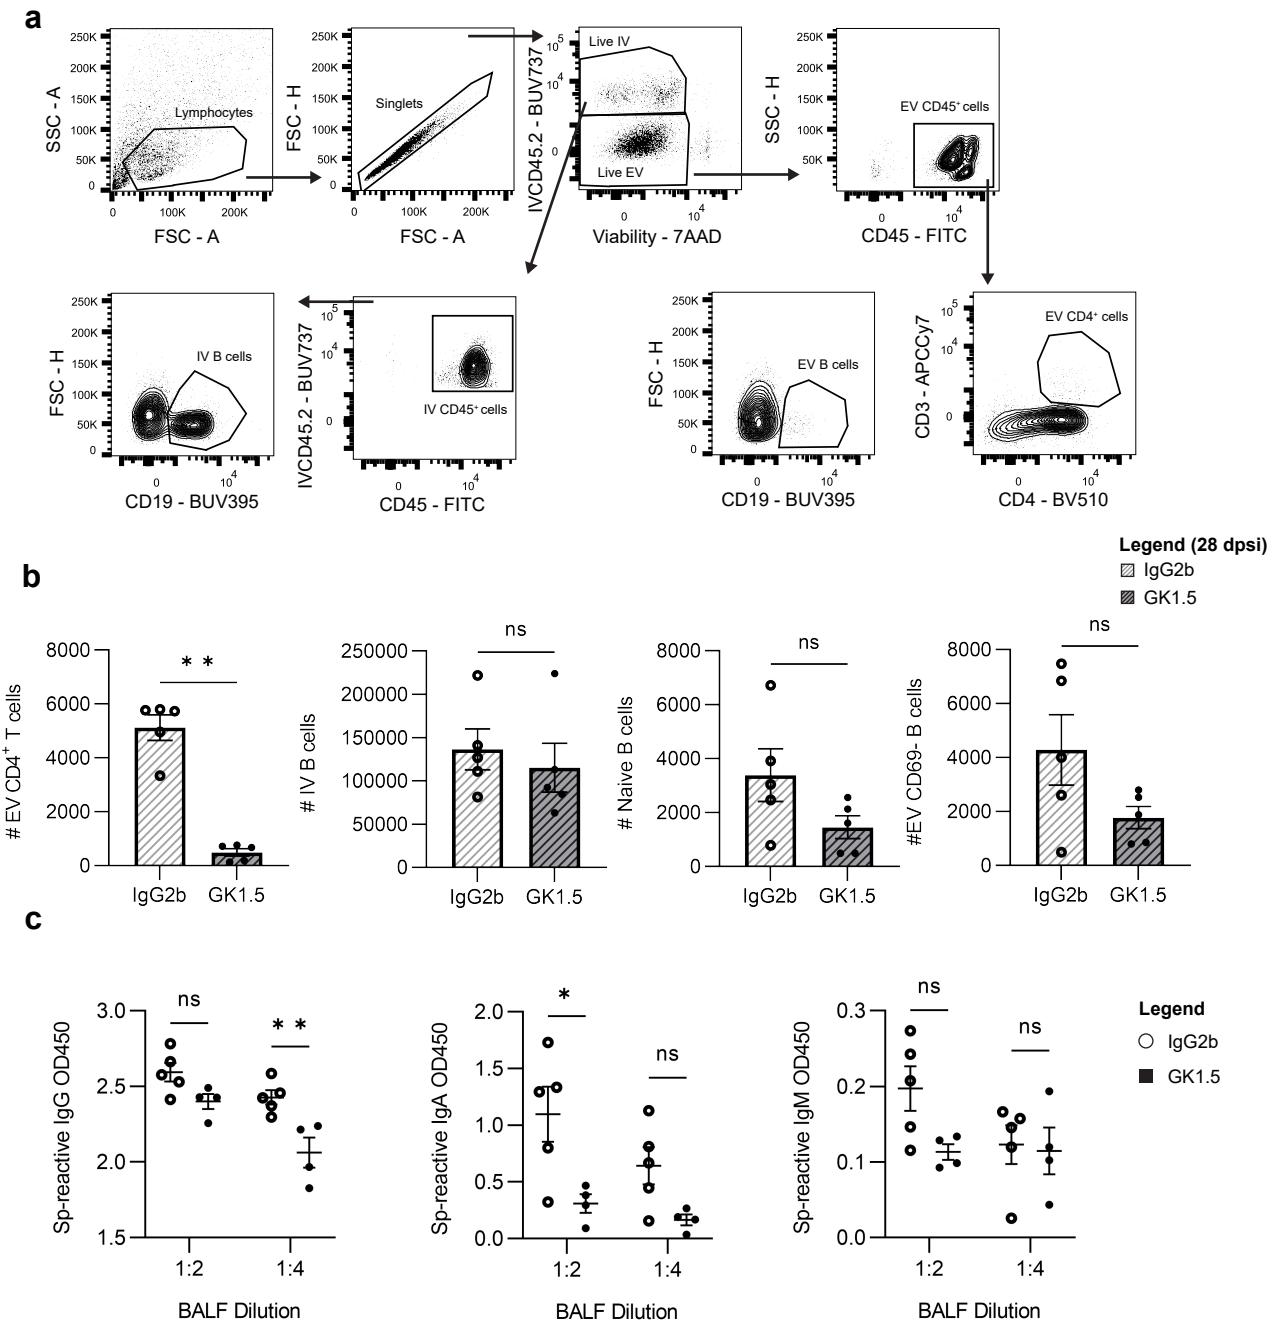

**Supplementary Figure 4:** Evaluation of lung EV B cells and antibody secreting cell function after CD4<sup>+</sup> cell depletion. **a**) Gating strategy to evaluate live IV (i.v. CD45.2<sup>+</sup>) and EV (i.v. CD45.2<sup>-</sup>) B cells (CD45<sup>+</sup>CD19<sup>+</sup>) and T cells (CD45<sup>+</sup>CD3<sup>+</sup>CD4<sup>+</sup>). **b**) Enumeration of live EV CD4<sup>+</sup> T cells, IV B cells, EV naïve B cells (i.v.CD45.2-CD19<sup>+</sup>IgD<sup>+</sup>), and CD69<sup>+</sup> resident (i.v.CD45.2-CD19<sup>+</sup>CD69<sup>+</sup>) B cells 28 dps after treatment with GK1.5 (grey bars with stripes) or IgG2b (white bars with stripes). n = 5 per group across 2 independent experiments. Mann-Whitney tests; \*\*p<0.01; ns, not significant **c**) Acapsular Sp3-reactive IgG, IgA, and IgM titers in BALF from mice treated with GK1.5 vs. IgG2b were measured via whole-cell pneumococcal ELISAs. n = 4-5 per group across 2 independent experiments. Mann-Whitney tests; \*p<0.05; \*\*p<0.01; ns, not significant.

## Supplementary Figure 5

### a Legend (2 dps)

□ IgG  
■ MR1

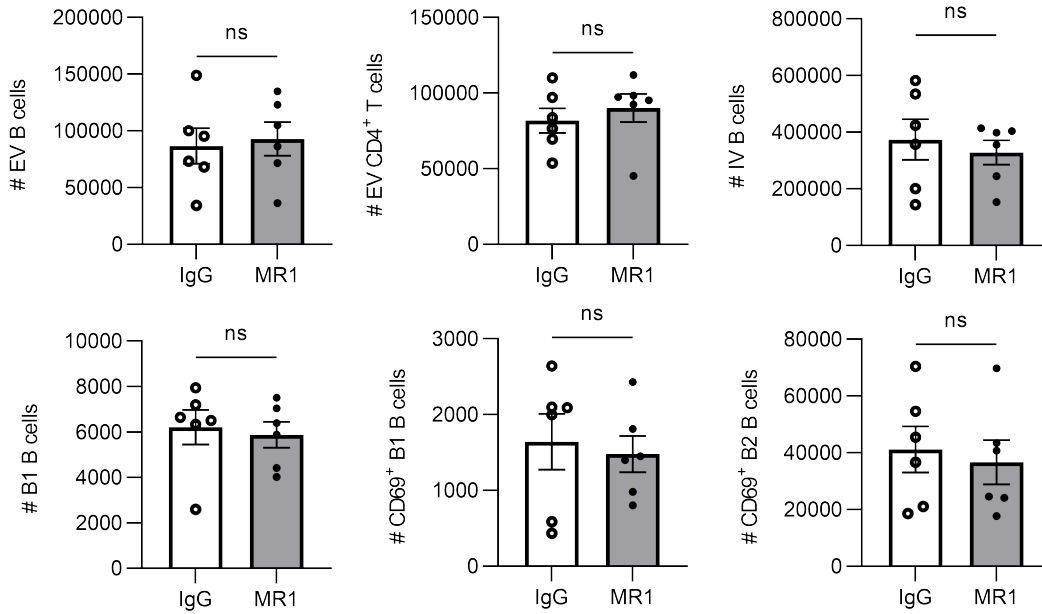

### b Legend (28 dps)

▨ IgG  
▩ MR1

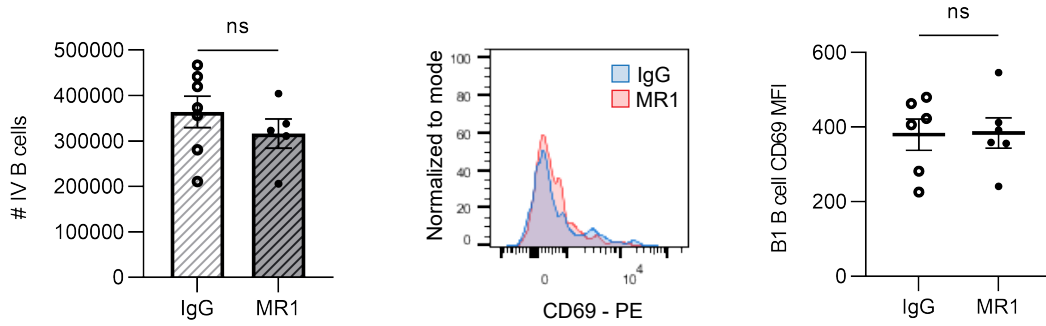

### c Legend

○ IgG  
■ MR1

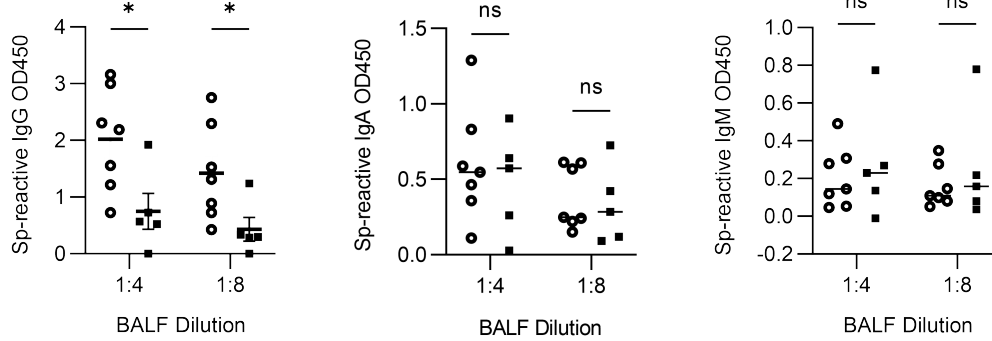

**Supplemental Figure 5:** Evaluation of lung EV B cells and antibody secreting cell function after CD40L blockade. **a)** Enumeration of live EV B (i.v.CD45.2<sup>-</sup>CD19<sup>+</sup>), CD4<sup>+</sup> T (i.v.CD45.2<sup>-</sup>CD3<sup>+</sup>CD4<sup>+</sup>), IV B (i.v.CD45.2<sup>+</sup>CD19<sup>+</sup>), EV B1 B (i.v.CD45.2<sup>-</sup>CD19<sup>+</sup>CD43<sup>hi</sup>B220<sup>lo</sup>), CD69<sup>+</sup> B1 B (i.v.CD45.2<sup>-</sup>CD19<sup>+</sup>CD43<sup>hi</sup>B220<sup>lo</sup>CD69<sup>+</sup>), and CD69<sup>+</sup> B2 B (i.v.CD45.2<sup>-</sup>CD19<sup>+</sup>CD43<sup>lo</sup>B220<sup>hi</sup>CD69<sup>+</sup>) cells 2 dpi after treatment with MR1 (grey bars) or IgG (white bars). n=6 per group across 2 independent experiments. Mann-Whitney tests; ns, not significant. **b)** Enumeration of live IV B (i.v.CD45.2<sup>+</sup>CD19<sup>+</sup>) cells and representative overlaid EV B1 B (i.v.CD45.2<sup>-</sup>CD19<sup>+</sup>CD43<sup>hi</sup>B220<sup>lo</sup>) cell CD69 MFI plots normalized to mode from mice treated with MR1 (red) vs. IgG (blue), with accompanying individual sample MFIs. **c)** Acapsular Sp3-reactive IgG, IgA, and IgM titers in BALF from mice treated with MR1 vs. IgG2b were measured via whole-cell pneumococcal ELISAs. n = 5-7 per group across 2 independent experiments. Mann-Whitney tests; \*p<0.05; ns, not significant.

## Supplementary Videos

**Video 1-2:** Live ex vivo imaging of Sp19F-experienced CD19-Cre PZTD mouse lung surface in crystal ribcage62 at the day 35 timepoint with controlled physiologic ventilation and circulation. Timelapse capture of over 30 minutes depicted at 100x speed. TdTomato+ cells (CD19+PDL2+) are observed to exhibit probing behavior among alveoli.

**Video 3-4:** Live ex vivo imaging of Sp19F-experienced CD19-Cre PZTD mouse lung surface in crystal ribcage62 24 hours after being challenged with Sp3 i.t. with controlled physiologic ventilation and circulation. Timelapse capture over 30 minutes depicted at 100x speed. TdTomato+ cells (CD19+PDL2+) are observed amid alveoli to be largely sessile 24 hpi with Sp3.



| <b>Antibodies used for flow cytometry</b> |                  |              |                |
|-------------------------------------------|------------------|--------------|----------------|
| <b>Marker</b>                             | <b>Conjugate</b> | <b>Clone</b> | <b>Vendor</b>  |
| B220                                      | APC Fire 750     | RA 3-6B2     | BioLegend      |
| B220                                      | BUV737           | RA3-6B2      | BD Biosciences |
| CD11a                                     | BV786            | M17/4        | BD Biosciences |
| CD138                                     | PE               | 281-2        | BioLegend      |
| CD19                                      | BV605            | 6D5          | BioLegend      |
| CD19                                      | BUV395           | 1D3          | BioLegend      |
| CD19                                      | APC-Cy7          | 6D5          | BioLegend      |
| CD19                                      | BUV395           | 1D3          | BioLegend      |
| CD21/35                                   | PE               | 7.00E+09     | BioLegend      |
| CD23                                      | FITC             | B3B4         | BioLegend      |
| CD25                                      | PECy5.5          | PC61         | BD Biosciences |
| CD38                                      | PerCPeF710       | 90           | ThermoFisher   |
| CD3ε                                      | AF647            | 145-2C11     | BioLegend      |
| CD3ε                                      | BV421            | 145-2C11     | BioLegend      |
| CD4                                       | AF700            | RM4-4        | BioLegend      |
| CD4                                       | BV510            | GK1.5        | BioLegend      |
| CD43                                      | BV750            | S7           | BD Biosciences |
| CD43                                      | PerCPCy5.5       | S11          | BioLegend      |
| CD44                                      | BV570            | IM7          | BioLegend      |
| CD45                                      | AF532            | 30-F11       | ThermoFisher   |
| CD45                                      | FITC             | 30-F11       | BioLegend      |
| CD45                                      | PerCPCy5.5       | 30-F11       | BioLegend      |
| CD45                                      | FITC             | 30-F11       | BioLegend      |
| CD45.2                                    | BUV737           | 104          | BD Biosciences |
| CD62L                                     | BV650            | MEL-14       | BD Biosciences |
| CD69                                      | PE               | H1.2F3       | BioLegend      |
| CD73                                      | PEVio77          | REA778       | Miltenyi       |
| CD73                                      | APC              | TY/11.8      | BioLegend      |
| CD8a                                      | AF488            | 53-6.7       | BioLegend      |
| CD8a                                      | BV510            | 53-6.7       | BioLegend      |
| CXCR5                                     | PEeF610          | SPRCL5       | eBioscience    |
| GL7                                       | Biotin           | GL7          | BioLegend      |
| IgD                                       | AF488            | 11-26c       | BioLegend      |
| IgD                                       | BV421            | 11-26c.2a    | BioLegend      |
| IgM                                       | eF450            | eB121-15F9   | ThermoFisher   |
| IgM                                       | PECy7            | RMM-1        | BioLegend      |
| PD-1                                      | BV510            | EH12-287     | BioLegend      |
| PD-L2                                     | APC              | TY25         | BioLegend      |
| PD-L2                                     | PE               | TY25         | BioLegend      |

|              |       |      |           |
|--------------|-------|------|-----------|
| Streptavidin | BV421 | n/a  | BioLegend |
| Streptavidin | BV510 | n/a  | BioLegend |
| TACI         | APC   | 8F10 | BioLegend |

**Supplementary Table 1:** Antibodies used for flow cytometric studies. Cell surface marker, fluorescent conjugate, antibody clone, and vendor information are provided for each antibody.
